# Supplementary material for: Blood mercury concentrations are associated with decline in liver function in an elderly population: a panel study
Source: PubMed Central journal article supplement (PMC5336614; doi:10.1186/s12940-017-0228-2), 2017-03-04
Supplement: 12940_2017_228_MOESM1_ESM.pdf [file 12940_2017_228_MOESM1_ESM.pdf]

Table S1. Distribution of mercury at each visit and overall study

|         | visit  | N    | AM   | GM   | Percentile |       |       |       |          |
|---------|--------|------|------|------|------------|-------|-------|-------|----------|
|         |        |      |      |      | 0(Min)     | 25th  | 50th  | 75th  | 100(Max) |
| Mercury | First  | 550  | 3.38 | 2.78 | 0.605      | 1.852 | 2.638 | 3.979 | 71.001   |
|         | Second | 377  | 3.23 | 2.82 | 0.588      | 2.032 | 2.805 | 3.812 | 12.960   |
|         | Third  | 200  | 3.28 | 2.87 | 0.615      | 2.012 | 2.960 | 4.019 | 20.151   |
|         | Fourth | 60   | 3.16 | 2.86 | 0.843      | 2.059 | 2.965 | 3.851 | 7.246    |
|         | Fifth  | 35   | 2.89 | 2.65 | 0.964      | 2.023 | 2.661 | 3.658 | 6.748    |
|         | Total  | 1222 | 3.29 | 2.81 | 0.588      | 1.955 | 2.768 | 3.931 | 71.001   |

Abbreviations: AM, Arithmetic mean; GM, Geometric mean; Max, maximum; Min, minimum

Table S2. Estimated association between log transformed liver enzymes and total blood mercury levels using generalized estimating equations model in non-drinkers

| Mercury     | AST        |         | ALT        |              | GGT        |         |
|-------------|------------|---------|------------|--------------|------------|---------|
|             | Estimate   | p-value | Estimate   | p-value      | Estimate   | p-value |
| Non-drinker |            |         |            |              |            |         |
| Q1          | Ref        |         | Ref        |              | Ref        |         |
| Q2          | 0.01(0.03) | 0.705   | 0.03(0.03) | 0.374        | 0.01(0.04) | 0.764   |
| Q3          | 0.03(0.03) | 0.376   | 0.02(0.04) | 0.556        | 0.04(0.04) | 0.399   |
| Q4          | 0.06(0.03) | 0.099   | 0.10(0.05) | <b>0.022</b> | 0.06(0.04) | 0.215   |

Covariates: sex, age, smoking status, drinking status, exercise, education, high-density lipoproteins cholesterol, overweight and calorie

Abbreviations: ALT, Alanine transaminase; AST, aspartate aminotransferase; GGT, Gamma-glutamyl transferase;

Q, quartile

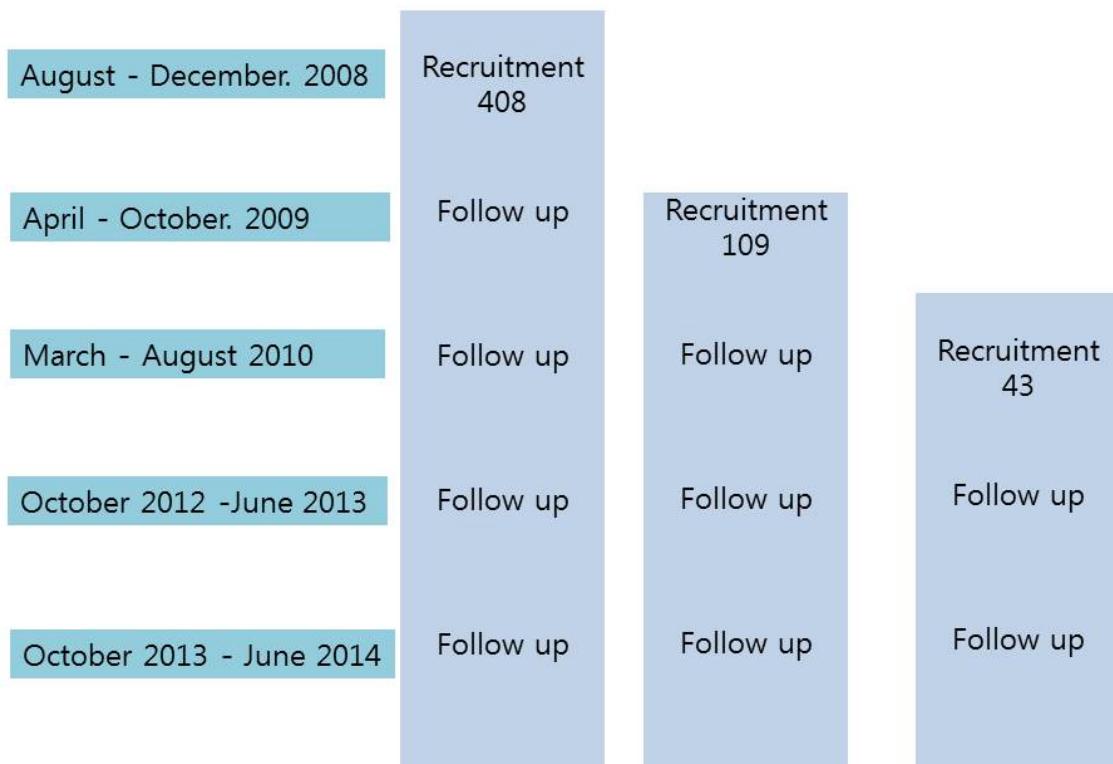

Fig S1. Flow chart for study participants

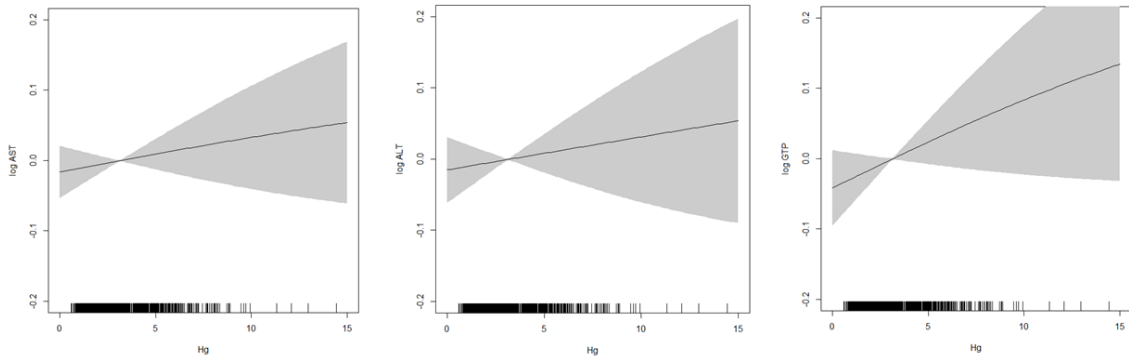

Fig S2. Generalized additive mixed model for total mercury concentrations and three liver enzymes. Additionally adjusted for sex, age, smoking status, drinking status, exercise, education, high-density lipoproteins cholesterol, overweight and calorie
